# Supplementary material for: The Multiple Sclerosis Intimacy and Sexuality Questionnaire (MSISQ-15): translation, adaptation and validation of the Polish version for patients with multiple sclerosis and spinal cord injury
Source: Springer Nature journal article supplement (doi:10.1186/s12883-021-02132-9), 2021-03-08
Supplement: MOESM1 [file 18940890]

## **MSISQ-15: Kwestionariusz dotyczący wpływu stwardnienia rozsianego lub urazu rdzenia kręgowego na intymność i seksualność**

*INSTRUKCJE: Aby lepiej zrozumieć wpływ stwardnienia rozsianego lub urazu rdzenia kręgowego na intymność i seksualność, prosimy, aby w tym obejmującym 15 pytań kwestionariuszu ocenił Pan/Pani, w jaki sposób różne objawy stwardnienia rozsianego lub urazu rdzenia kręgowego zakłócały Pana/Pani aktywność seksualną i satysfakcję seksualną w ciągu ostatnich sześciu miesięcy. Odpowiedzi można udzielać umieszczając krzyżyk lub jakkolwiek inny znak w kwadratowym polu przy pytaniu, pod właściwą cyfrą. Nie ma dobrych ani złych odpowiedzi. Jeśli nie jest Pan/Pani pewien, jak odpowiedzieć na pytanie, prosimy wybrać najlepszą możliwą odpowiedź.*

**NA PRZESTRZENI OSTATNICH SZEŚCIU MIESIĘCY, MOJĄ AKTYWNOŚĆ SEKSUALNĄ LUB SATYSFAKCJĘ SEKSUALNĄ ZAKŁÓCIŁY NASTĘPUJĄCE OBJAWY:**

|                                                                                                                          | nigdy<br>(1) | prawie<br>nigdy<br>(2) | czasami<br>(3) | prawie<br>zawsze<br>(4) | zawsze<br>(5) |
|--------------------------------------------------------------------------------------------------------------------------|--------------|------------------------|----------------|-------------------------|---------------|
| 1. napięcie mięśni lub skurcze ramion, nóg lub innych okolic ciała                                                       |              |                        |                |                         |               |
| 2. objawy z zakresu pęcherza moczowego lub układu moczowego                                                              |              |                        |                |                         |               |
| 3. objawy jelitowe                                                                                                       |              |                        |                |                         |               |
| 4. drżenie lub trzęsienie rąk lub innych części ciała                                                                    |              |                        |                |                         |               |
| 5. ból, pieczenie lub dyskomfort w ciele                                                                                 |              |                        |                |                         |               |
| 6. poczucie, że moje ciało jest mniej atrakcyjne                                                                         |              |                        |                |                         |               |
| 7. poczucie bycia mniej męskim lub kobiecym z powodu stwardnienia rozsianego/urazu rdzenia kręgowego                     |              |                        |                |                         |               |
| 8. słabsze czucie lub drętwienie genitaliów                                                                              |              |                        |                |                         |               |
| 9. strach przed odrzuceniem seksualnym z powodu stwardnienia rozsianego/urazu rdzenia kręgowego                          |              |                        |                |                         |               |
| 10. obawy o zaspokojenie seksualne mojego(-j) partnera(-ki)                                                              |              |                        |                |                         |               |
| 11. mniejsza pewność swojej seksualności z powodu stwardnienia rozsianego/urazu rdzenia kręgowego                        |              |                        |                |                         |               |
| 12. brak zainteresowania seksem lub brak pożądania                                                                       |              |                        |                |                         |               |
| 13. mniej intensywne lub przyjemne orgazmy lub szczytowania                                                              |              |                        |                |                         |               |
| 14. zbyt długie osiągnięcie orgazmu lub szczytowania                                                                     |              |                        |                |                         |               |
| 15. nieodpowiednie nawilżenie pochwy (kobiety)/ trudności w osiągnięciu lub utrzymaniu zadowalającej erekcji (mężczyźni) |              |                        |                |                         |               |

Pozycje podskali dotyczące pierwotnych zaburzeń seksualnych: 8, 12, 13, 14, 15;  
 pozycje podskali dotyczące wtórnych zaburzeń seksualnych: 1, 2, 3, 4, 5;  
 pozycje podskali dotyczące trzeciorzędowych zaburzeń seksualnych: 6, 7, 9, 10, 11.
